# Supplementary material for: Robust network structure of the Sln1-Ypd1-Ssk1 three-component phospho-relay prevents unintended activation of the HOG MAPK pathway in Saccharomyces cerevisiae
Source: PubMed Central journal article supplement (PMC4377207; doi:10.1186/s12918-015-0158-y), 2015-03-25
Supplement: 12918_2015_158_MOESM1_ESM.pdf [file 12918_2015_158_MOESM1_ESM.pdf]

# Supplemental Figure 1

$\beta$ -estradiol concentration on plate:

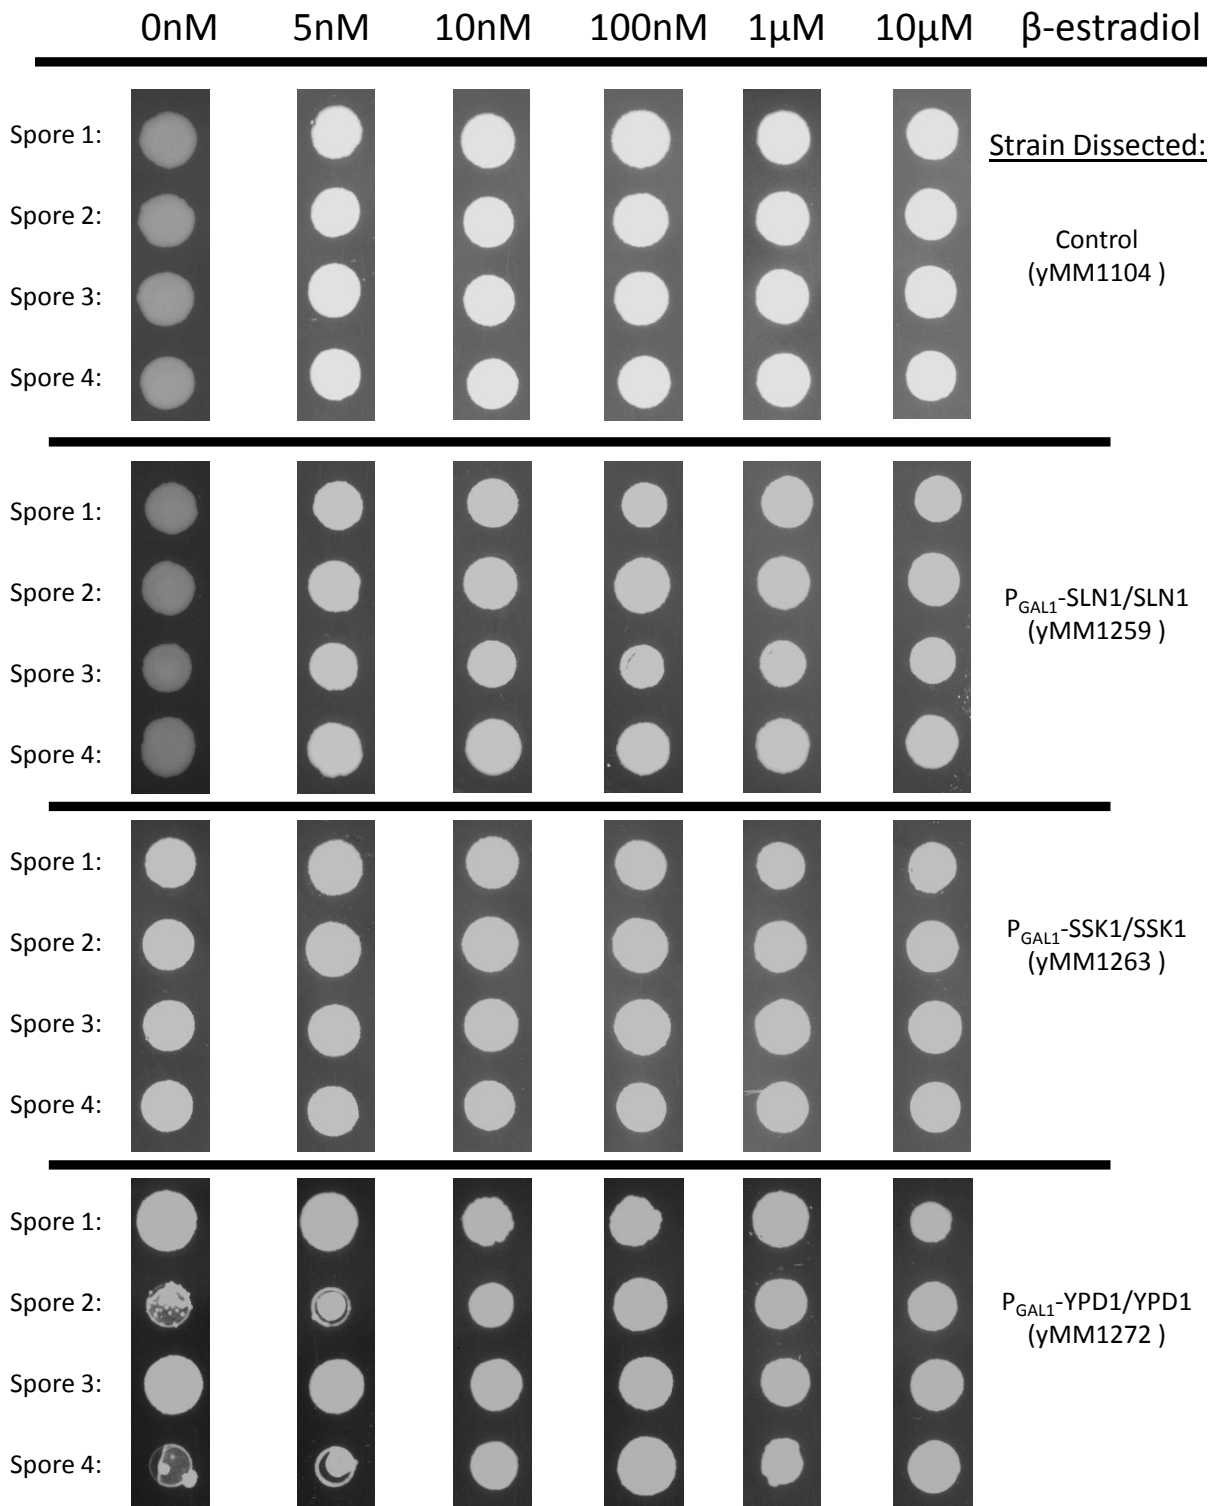

**Figure S1: Underexpression of Ypd1 but not other relay components causes a growth defect.** Diploid homozygous GEV strains carrying one inducible allele of a relay component (GENE/ $P_{GAL1}$ -GENE) were sporulated onto 10nM  $\beta$ -estradiol and individual spores were frogged onto plates containing different  $\beta$ -estradiol concentrations. Only underexpression of Ypd1 causes a growth defect.
