# Supplementary material for: Robust network structure of the Sln1-Ypd1-Ssk1 three-component phospho-relay prevents unintended activation of the HOG MAPK pathway in Saccharomyces cerevisiae
Source: PubMed Central journal article supplement (PMC4377207; doi:10.1186/s12918-015-0158-y), 2015-03-25
Supplement: 12918_2015_158_MOESM2_ESM.pdf [file 12918_2015_158_MOESM2_ESM.pdf]

# Supplemental Table 1

| Strain  | Relevant Genotype                                              | Full Genotype                                                                                                                                                                                                                                                                                                            | Reference                  |
|---------|----------------------------------------------------------------|--------------------------------------------------------------------------------------------------------------------------------------------------------------------------------------------------------------------------------------------------------------------------------------------------------------------------|----------------------------|
| yMM598  | Wild-type GEV Mata                                             | Mata $\alpha$ (P <sub>GAL10</sub> +gal1) $\Delta$ ::loxP gal4 $\Delta$ ::LEU2 HAP1 leu2 $\Delta$ 0::P <sub>ACT1</sub> -GEV-NatMX                                                                                                                                                                                         | Mclsaac, et al. 2011       |
| yMM630  | Wild-type GEV ura3 $\Delta$                                    | Mata $\alpha$ (P <sub>GAL10</sub> +gal1) $\Delta$ ::loxP gal4 $\Delta$ ::LEU2, HAP1 leu2 $\Delta$ 0::P <sub>ACT1</sub> -GEV-NatMX ura3 $\Delta$ ::HphMX4                                                                                                                                                                 | Mclsaac, et al. 2011       |
| yMM1100 | gal10 $\Delta$ ::KanMX                                         | MAT a gal10 $\Delta$ ::KanMX his3 $\Delta$ 1 leu2 $\Delta$ 0 lys2 $\Delta$ 0 ura3 $\Delta$ 0                                                                                                                                                                                                                             | Invitrogen                 |
| yMM1101 | Wild-type GEV Mata                                             | Mat a (P <sub>GAL10</sub> +gal1) $\Delta$ ::loxP gal4 $\Delta$ ::LEU2 HAP1 leu2 $\Delta$ 0::P <sub>ACT1</sub> -GEV-NatMX                                                                                                                                                                                                 | Mclsaac, et al. (DBY12020) |
| yMM1104 | Wild-type GEV/GEV                                              | MATa/ $\alpha$ (P <sub>GAL10</sub> +gal1) $\Delta$ ::loxP/ (P <sub>GAL10</sub> +gal1) $\Delta$ ::loxP leu2 $\Delta$ 0::P <sub>ACT1</sub> -GEV-NatMX/ leu2 $\Delta$ 0::P <sub>ACT1</sub> -GEV-NatMX gal4 $\Delta$ ::LEU2/gal4 $\Delta$ ::LEU2                                                                             | This study                 |
| yMM1259 | GEV/GEV P <sub>GAL1</sub> -SLN1/SLN1                           | MATa/ $\alpha$ (P <sub>GAL10</sub> +gal1) $\Delta$ ::loxP/ (P <sub>GAL10</sub> +gal1) $\Delta$ ::loxP leu2 $\Delta$ 0::P <sub>ACT1</sub> -GEV-NatMX/ leu2 $\Delta$ 0::P <sub>ACT1</sub> -GEV-NatMX gal4 $\Delta$ ::LEU2/gal4 $\Delta$ ::LEU2 SLN1/KanMX-P <sub>GAL1</sub> -SLN1                                          | This study                 |
| yMM1263 | GEV/GEV P <sub>GAL1</sub> -SSK1/SSK1                           | MATa/ $\alpha$ (P <sub>GAL10</sub> +gal1) $\Delta$ ::loxP/ (P <sub>GAL10</sub> +gal1) $\Delta$ ::loxP leu2 $\Delta$ 0::P <sub>ACT1</sub> -GEV-NatMX/ leu2 $\Delta$ 0::P <sub>ACT1</sub> -GEV-NatMX gal4 $\Delta$ ::LEU2/gal4 $\Delta$ ::LEU2 SSK1/KanMX-P <sub>GAL1</sub> -SSK1                                          | This study                 |
| yMM1264 | GEV/GEV P <sub>GAL1</sub> -SSK1/SSK1                           | MATa/ $\alpha$ (P <sub>GAL10</sub> +gal1) $\Delta$ ::loxP/ (P <sub>GAL10</sub> +gal1) $\Delta$ ::loxP leu2 $\Delta$ 0::P <sub>ACT1</sub> -GEV-NatMX/ leu2 $\Delta$ 0::P <sub>ACT1</sub> -GEV-NatMX gal4 $\Delta$ ::LEU2/gal4 $\Delta$ ::LEU2 HAP1/HAP1 SSK1/KanMX-P <sub>GAL1</sub> -SSK1                                | This study                 |
| yMM1272 | GEV/GEV P <sub>GAL1</sub> -YPD1/YPD1                           | MAT a/ $\alpha$ (P <sub>GAL10</sub> +gal1) $\Delta$ ::loxP/ (P <sub>GAL10</sub> +gal1) $\Delta$ ::loxP leu2 $\Delta$ 0::P <sub>ACT1</sub> -GEV-NatMX/ leu2 $\Delta$ 0::P <sub>ACT1</sub> -GEV-NatMX gal4 $\Delta$ ::LEU2/gal4 $\Delta$ ::LEU2 YPD1/KanMX-P <sub>GAL1</sub> -YPD1                                         | This study                 |
| yMM1277 | GEV/GEV P <sub>GAL1</sub> -PBS2/PBS2                           | MATa/ $\alpha$ (P <sub>GAL10</sub> +gal1) $\Delta$ ::loxP/ (P <sub>GAL10</sub> +gal1) $\Delta$ ::loxP leu2 $\Delta$ 0::P <sub>ACT1</sub> -GEV-NatMX/ leu2 $\Delta$ 0::P <sub>ACT1</sub> -GEV-NatMX gal4 $\Delta$ ::LEU2/gal4 $\Delta$ ::LEU2 HAP1/HAP1 PBS2/KanMX-P <sub>GAL1</sub> -PBS2                                | This study                 |
| yMM1286 | GEV/GEV P <sub>GAL1</sub> -PBS2/PBS2                           | MAT a/ $\alpha$ HAP1+/HAP1+ (P <sub>GAL10</sub> +gal1) $\Delta$ ::loxP/ (P <sub>GAL10</sub> +gal1) $\Delta$ ::loxP leu2 $\Delta$ 0::P <sub>ACT1</sub> -GEV-NatMX/ leu2 $\Delta$ 0::P <sub>ACT1</sub> -GEV-NatMX gal4 $\Delta$ ::LEU2/gal4 $\Delta$ ::LEU2 PBS2/KanMX-P <sub>GAL1</sub> -PBS2                             | This study                 |
| yMM1287 | GEV/GEV P <sub>GAL1</sub> -SSK22/SSK22                         | MAT a/ $\alpha$ HAP1+/HAP1+ (P <sub>GAL10</sub> +gal1) $\Delta$ ::loxP/ (P <sub>GAL10</sub> +gal1) $\Delta$ ::loxP leu2 $\Delta$ 0::P <sub>ACT1</sub> -GEV-NatMX/ leu2 $\Delta$ 0::P <sub>ACT1</sub> -GEV-NatMX gal4 $\Delta$ ::LEU2/gal4 $\Delta$ ::LEU2 SSK22/KanMX-P <sub>GAL1</sub> -SSK22                           | This study                 |
| yMM1296 | Wild-type STL1/P <sub>STL1</sub> -yEVENUS                      | MATa/ $\alpha$ (P <sub>GAL10</sub> +gal1) $\Delta$ ::loxP/ (P <sub>GAL10</sub> +gal1) $\Delta$ ::loxP leu2 $\Delta$ 0::P <sub>ACT1</sub> -GEV-NatMX/ leu2 $\Delta$ 0::P <sub>ACT1</sub> -GEV-NatMX gal4 $\Delta$ ::LEU2/gal4 $\Delta$ ::LEU2 HAP1/HAP1 STL1/P <sub>STL1</sub> -yEVENUS-HphMX                             | This study                 |
| yMM1298 | STL1/P <sub>STL1</sub> -yEVENUS P <sub>GAL1</sub> -YPD1/YPD1   | MATa/ $\alpha$ (P <sub>GAL10</sub> +gal1) $\Delta$ ::loxP/ (P <sub>GAL10</sub> +gal1) $\Delta$ ::loxP leu2 $\Delta$ 0::P <sub>ACT1</sub> -GEV-NatMX/ leu2 $\Delta$ 0::P <sub>ACT1</sub> -GEV-NatMX gal4 $\Delta$ ::LEU2/gal4 $\Delta$ ::LEU2 YPD1/KanMX-P <sub>GAL1</sub> -YPD1 STL1/P <sub>STL1</sub> -yEVENUS-HphMX    | This study                 |
| yMM1300 | STL1/P <sub>STL1</sub> -yEVENUS P <sub>GAL1</sub> -SSK1/SSK1   | MAT a/ $\alpha$ (P <sub>GAL10</sub> +gal1) $\Delta$ ::loxP/ (P <sub>GAL10</sub> +gal1) $\Delta$ ::loxP leu2 $\Delta$ 0::P <sub>ACT1</sub> -GEV-NatMX/ leu2 $\Delta$ 0::P <sub>ACT1</sub> -GEV-NatMX gal4 $\Delta$ ::LEU2/gal4 $\Delta$ ::LEU2 SSK1/KanMX-P <sub>GAL1</sub> -SSK1 STL1/P <sub>STL1</sub> -yEVENUS-HphMX   | This study                 |
| yMM1301 | STL1/P <sub>STL1</sub> -yEVENUS P <sub>GAL1</sub> -SLN1/SLN1   | MAT a/ $\alpha$ (P <sub>GAL10</sub> +gal1) $\Delta$ ::loxP/ (P <sub>GAL10</sub> +gal1) $\Delta$ ::loxP leu2 $\Delta$ 0::P <sub>ACT1</sub> -GEV-NatMX/ leu2 $\Delta$ 0::P <sub>ACT1</sub> -GEV-NatMX gal4 $\Delta$ ::LEU2/gal4 $\Delta$ ::LEU2 SLN1/KanMX-P <sub>GAL1</sub> -SLN1 STL1/P <sub>STL1</sub> -yEVENUS-HphMX   | This study                 |
| yMM1304 | STL1/P <sub>STL1</sub> -yEVENUS P <sub>GAL1</sub> -PBS2/PBS2   | MAT a/ $\alpha$ (P <sub>GAL10</sub> +gal1) $\Delta$ ::loxP/ (P <sub>GAL10</sub> +gal1) $\Delta$ ::loxP leu2 $\Delta$ 0::P <sub>ACT1</sub> -GEV-NatMX/ leu2 $\Delta$ 0::P <sub>ACT1</sub> -GEV-NatMX gal4 $\Delta$ ::LEU2/gal4 $\Delta$ ::LEU2 PBS2/KanMX-P <sub>GAL1</sub> -PBS2 STL1/P <sub>STL1</sub> -yEVENUS-HphMX   | This study                 |
| yMM1305 | STL1/P <sub>STL1</sub> -yEVENUS P <sub>GAL1</sub> -SSK22/SSK22 | MAT a/ $\alpha$ (P <sub>GAL10</sub> +gal1) $\Delta$ ::loxP/ (P <sub>GAL10</sub> +gal1) $\Delta$ ::loxP leu2 $\Delta$ 0::P <sub>ACT1</sub> -GEV-NatMX/ leu2 $\Delta$ 0::P <sub>ACT1</sub> -GEV-NatMX gal4 $\Delta$ ::LEU2/gal4 $\Delta$ ::LEU2 SSK22/KanMX-P <sub>GAL1</sub> -SSK22 STL1/P <sub>STL1</sub> -yEVENUS-HphMX | This study                 |
| yMM1313 | [P <sub>GAL1</sub> -PBS2 scURA3 2 $\mu$ ]                      | Mata $\alpha$ (P <sub>GAL10</sub> +gal1) $\Delta$ ::loxP, gal4 $\Delta$ ::LEU2, HAP1 leu2 $\Delta$ 0::P <sub>ACT1</sub> -GEV-NatMX ura3 $\Delta$ ::HphMX [pMM330 P <sub>GAL1</sub> -PBS2 scURA3 2 $\mu$ ]                                                                                                                | This study                 |
| yMM1314 | [P <sub>GAL1</sub> -SSK22 scURA3 2 $\mu$ ]                     | Mata $\alpha$ (P <sub>GAL10</sub> +gal1) $\Delta$ ::loxP, gal4 $\Delta$ ::LEU2, HAP1 leu2 $\Delta$ 0::P <sub>ACT1</sub> -GEV-NatMX ura3 $\Delta$ ::HphMX [pMM331 P <sub>GAL1</sub> -SSK22 scURA3 2 $\mu$ ]                                                                                                               | This study                 |
| yMM1315 | [P <sub>GAL1</sub> -SLN1 scURA3 2 $\mu$ ]                      | Mata $\alpha$ (P <sub>GAL10</sub> +gal1) $\Delta$ ::loxP, gal4 $\Delta$ ::LEU2, HAP1 leu2 $\Delta$ 0::P <sub>ACT1</sub> -GEV-NatMX ura3 $\Delta$ ::HphMX [pMM332 P <sub>GAL1</sub> -SLN1 scURA3 2 $\mu$ ]                                                                                                                | This study                 |
| yMM1316 | [P <sub>GAL1</sub> -YPD1 scURA3 2 $\mu$ ]                      | Mata $\alpha$ (P <sub>GAL10</sub> +gal1) $\Delta$ ::loxP, gal4 $\Delta$ ::LEU2, HAP1 leu2 $\Delta$ 0::P <sub>ACT1</sub> -GEV-NatMX ura3 $\Delta$ ::HphMX4 [pMM333 P <sub>GAL1</sub> -YPD1 scURA3 2 $\mu$ ]                                                                                                               | This study                 |
| yMM1317 | [P <sub>GAL1</sub> -SSK1 scURA3 2 $\mu$ ]                      | Mata $\alpha$ (P <sub>GAL10</sub> +gal1) $\Delta$ ::loxP, gal4 $\Delta$ ::LEU2, HAP1 leu2 $\Delta$ 0::P <sub>ACT1</sub> -GEV-NatMX ura3 $\Delta$ ::HphMX4 [pMM334 P <sub>GAL1</sub> -SSK1 scURA3 2 $\mu$ ]                                                                                                               | This study                 |
| yMM1318 | [P <sub>GAL1</sub> scURA3 2 $\mu$ ]                            | Mata $\alpha$ (P <sub>GAL10</sub> +gal1) $\Delta$ ::loxP, gal4 $\Delta$ ::LEU2, HAP1 leu2 $\Delta$ 0::P <sub>ACT1</sub> -GEV-NatMX ura3 $\Delta$ ::HphMX4 [pMM329 P <sub>GAL1</sub> scURA3 2 $\mu$ ]                                                                                                                     | This study                 |
| yMM1333 | ssk1 $\Delta$                                                  | (P <sub>GAL10</sub> +gal1) $\Delta$ ::loxP gal4 $\Delta$ ::LEU2 HAP1 leu2 $\Delta$ 0::P <sub>ACT1</sub> -GEV-NatMX ura3 $\Delta$ ::HphMX ssk1::KanMX                                                                                                                                                                     | This study                 |
| yMM1335 | ssk1 $\Delta$ [P <sub>GAL1</sub> scURA3 2 $\mu$ ]              | (P <sub>GAL10</sub> +gal1) $\Delta$ ::loxP gal4 $\Delta$ ::LEU2 HAP1 leu2 $\Delta$ 0::P <sub>ACT1</sub> -GEV-NatMX ura3 $\Delta$ ::HphMX ssk1::KanMX [pMM329 P <sub>GAL1</sub> scURA3 2 $\mu$ ]                                                                                                                          | This study                 |
| yMM1338 | ssk1 $\Delta$ [P <sub>GAL1</sub> -SLN1 scURA3 2 $\mu$ ]        | (P <sub>GAL10</sub> +gal1) $\Delta$ ::loxP gal4 $\Delta$ ::LEU2 HAP1 leu2 $\Delta$ 0::P <sub>ACT1</sub> -GEV-NatMX ura3 $\Delta$ ::HphMX ssk1::KanMX [pMM332 P <sub>GAL1</sub> -SLN1 scURA3 2 $\mu$ ]                                                                                                                    | This study                 |

**Table S1: Yeast strains used in this study.**
