# Supplementary material for: Robust network structure of the Sln1-Ypd1-Ssk1 three-component phospho-relay prevents unintended activation of the HOG MAPK pathway in Saccharomyces cerevisiae
Source: PubMed Central journal article supplement (PMC4377207; doi:10.1186/s12918-015-0158-y), 2015-03-25
Supplement: 12918_2015_158_MOESM3_ESM.pdf [file 12918_2015_158_MOESM3_ESM.pdf]

| Plasmid ID | Alias                    | Description                             | Reference                    |
|------------|--------------------------|-----------------------------------------|------------------------------|
| pMM012     | pRS426                   | scURA3 2 $\mu$                          | Sikorski and Heiter, 1989    |
| pMM131     | pFA6-KanMX               | KanMX                                   | Goldstein and McCusker, 1999 |
| pMM280     | $\gamma$ Venus tag       | $\gamma$ EVenus HphMX                   | This study                   |
| pMM329     | P <sub>GAL1</sub> Empty  | P <sub>GAL1</sub> scURA3 2 $\mu$        | This study                   |
| pMM330     | P <sub>GAL1</sub> -PBS2  | P <sub>GAL1</sub> -PBS2 scURA3 2 $\mu$  | This study                   |
| pMM331     | P <sub>GAL1</sub> -SSK22 | P <sub>GAL1</sub> -SSK22 scURA3 2 $\mu$ | This study                   |
| pMM332     | P <sub>GAL1</sub> -SLN1  | P <sub>GAL1</sub> -SLN1 scURA3 2 $\mu$  | This study                   |
| pMM333     | P <sub>GAL1</sub> -YPD1  | P <sub>GAL1</sub> -YPD1 scURA3 2 $\mu$  | This study                   |
| pMM334     | P <sub>GAL1</sub> -SSK1  | P <sub>GAL1</sub> -SSK1 scURA3 2 $\mu$  | This study                   |

**Table S2: Plasmids used in this study.**
